# Supplementary material
Source: publisher figshare collection journal article supplement (https://tandf.figshare.com/ndownloader/files/20707356)
Supplement: Supplementary file 1 [file 20707356]

Supplemental material: Codes, subthemes and themes

| **Theme** | **Subtheme** | **Code** |
| --- | --- | --- |
| **The students used the video library in autonomous and arbitrary ways** | Students used the video library to create alternative learning opportunities | - Used as intended - As a surrogate patient - Copying MSEs or the interviewer’s questions - Looking for diagnosis/patient types - To learn interview techniques |
| Students used the video library to ensure optimal use of their time | - Student’s current mood or expectations to ward - Time effective - When waiting - Individual learning needs - The library encourages students to stay |
| Students worked with the video library in various ways | - Using different books and guidelines - Various forms of dialogue - No dialogue - Skipping to MSE writing - Working together - Using the professor’s MSEs as guideline - Differing levels of immersion (in material) - Following the instructions or not |
| **The students blended experiences from the video library and the ward** | Fusion of video library and clinical practices | - Watching videos and referring to patients at ward and vice versa - Watching videos and referring to lessons - Using videoed patients as standard reference - Preparing interviews |
| Videos were unlike real-time interviews | - Videos take less time than interviews - Videos allow you to focus on the patient - Videos allow you a better grasp of the full interview |
| **The students were challenged by shortcomings of the video library** | The absence of supervision | - No one to correct students making mistakes - No one to explain what the students do not understand - Wish for a doctor to explain - Does not consult the literature when failing to understand MSEs - Finding they were right though they did not fully agree with the professor’ MSE |
| The professor’s MSEs could be hard to understand | - Professor’s MSE is incomprehensible - Professor’s reasoning is unclear - Students do not agree with professor’s MSE |
| Inherent limitations | - No opportunity to ask questions - Using the video library away from the ward |
